# Supplementary material for: Breathing cessation events that compose the apnea–hypopnea index are distinctively associated with the adverse outcomes in Alzheimer’s disease
Source: PubMed Central journal article supplement (PMC10347810; doi:10.1186/s13195-023-01266-x), 2023-07-14

**A**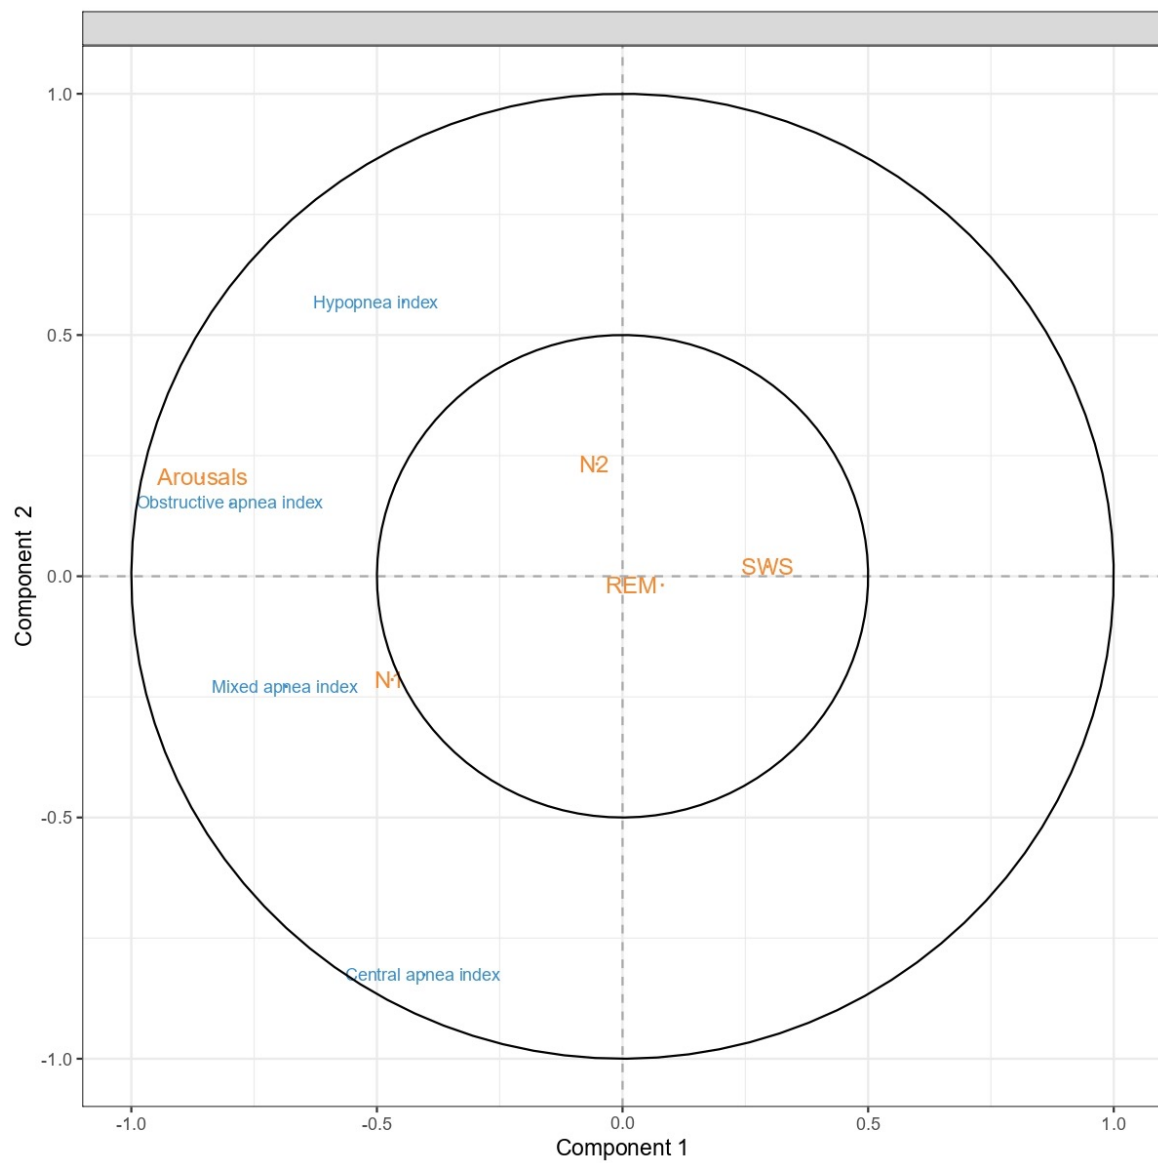**B**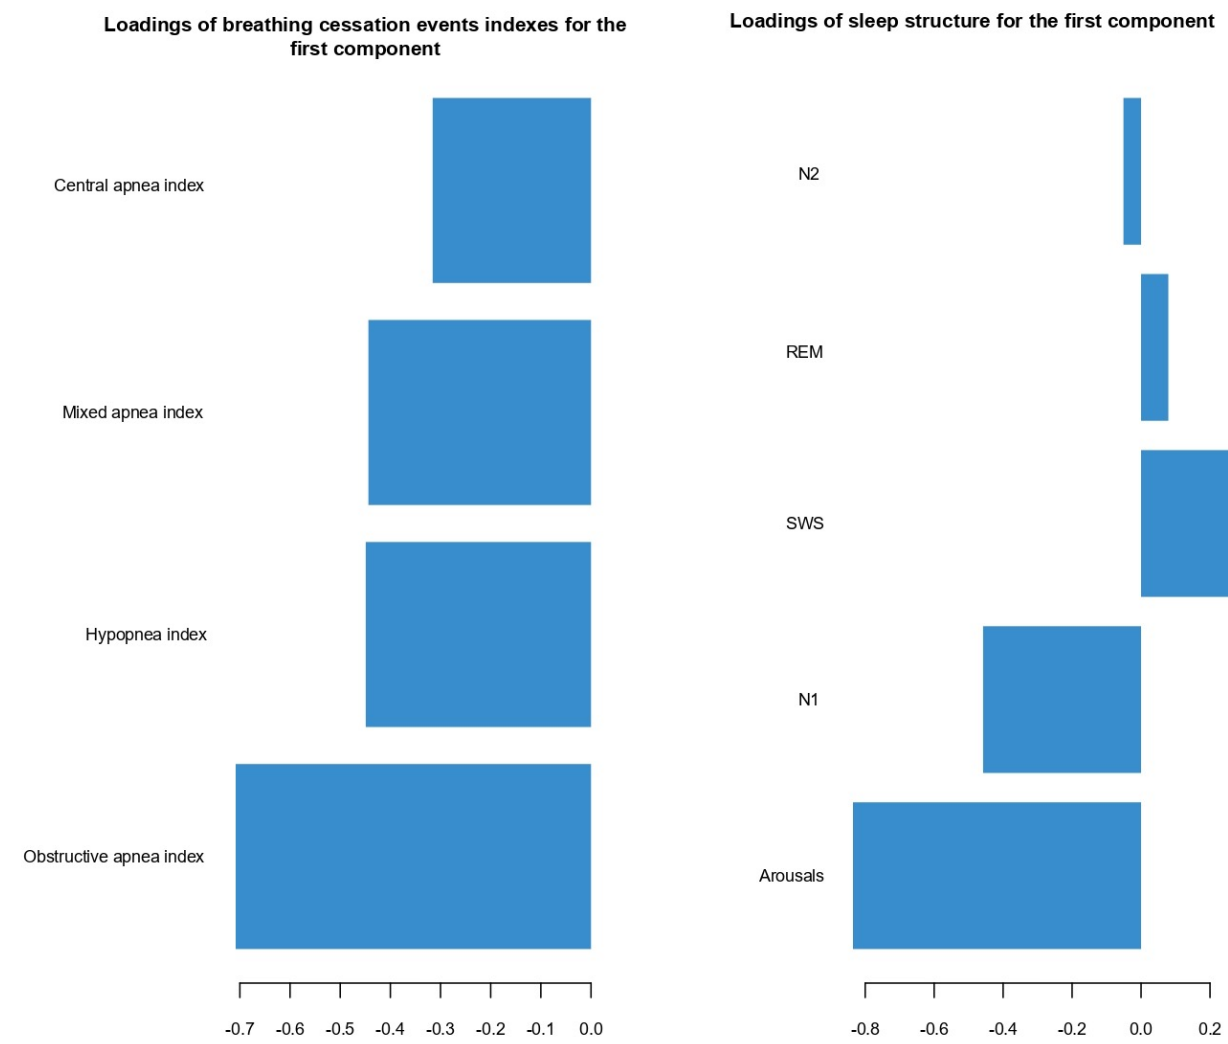

Supplement: 13195_2023_1266_MOESM5_ESM.pdf [file 13195_2023_1266_MOESM5_ESM.pdf]
