# Supplementary material for: Breathing cessation events that compose the apnea–hypopnea index are distinctively associated with the adverse outcomes in Alzheimer’s disease
Source: Springer Nature journal article supplement (doi:10.1186/s13195-023-01266-x), 2023-07-14

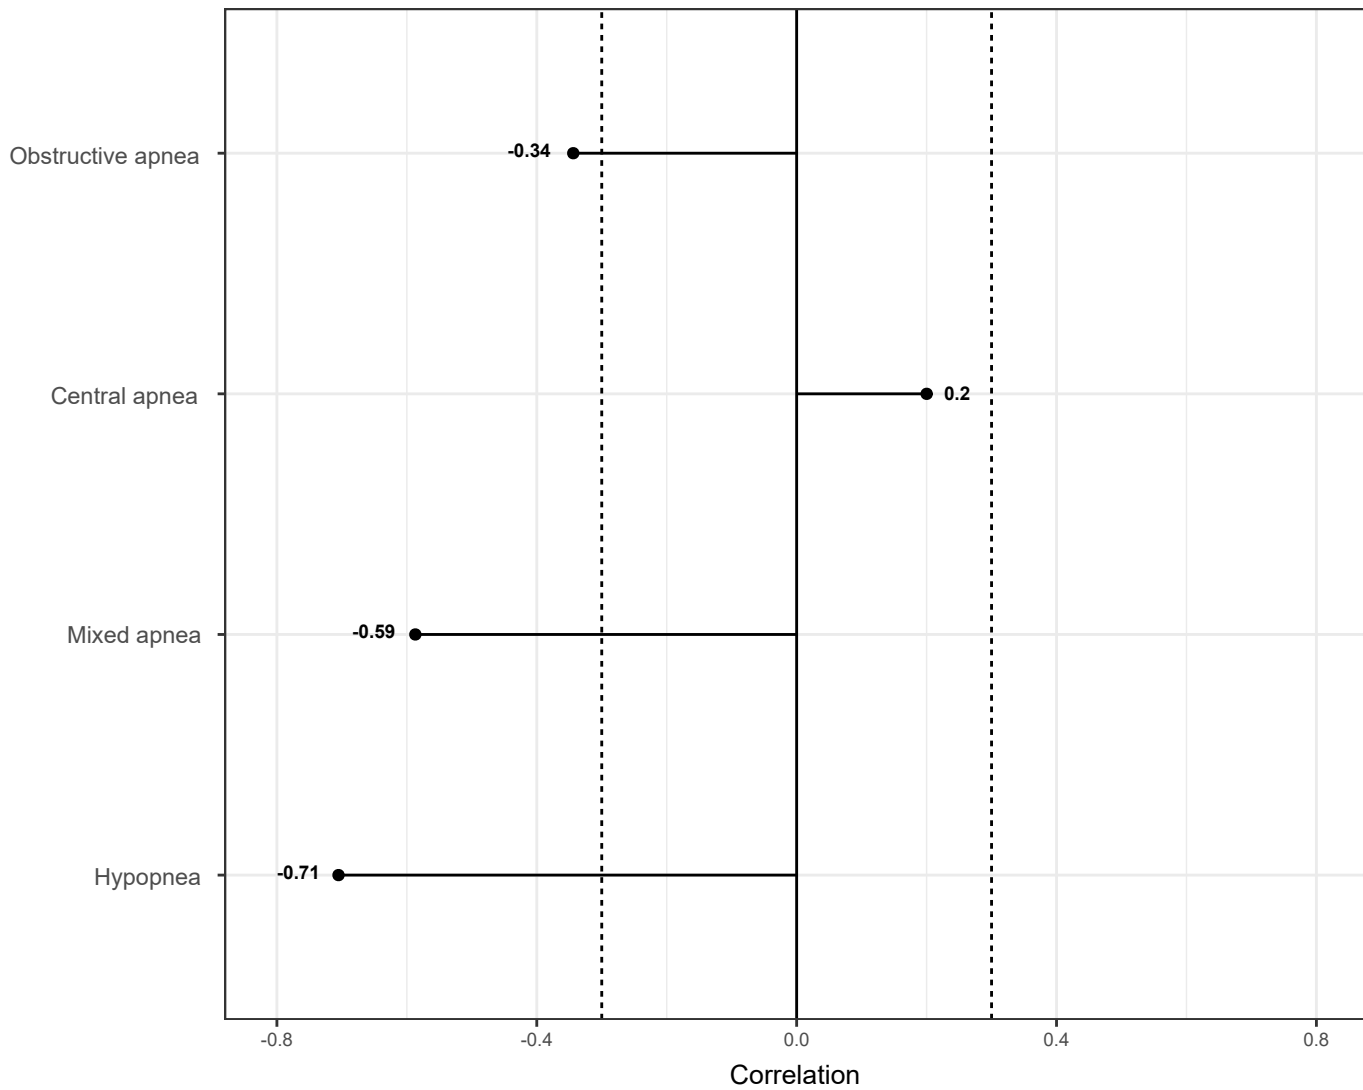

Supplement: MOESM7 [file 25788096]
