# Supplementary material for: Breathing cessation events that compose the apnea–hypopnea index are distinctively associated with the adverse outcomes in Alzheimer’s disease
Source: Alzheimers Res Ther. 2023 Jul 14;15:123. doi: 10.1186/s13195-023-01266-x (PMC10347810; doi:10.1186/s13195-023-01266-x)
Supplement: Supplementary file 1 — Additional file 1: Table S1. Frequency of the breathing cessation events. [file 13195_2023_1266_MOESM1_ESM.xlsx]

## Sheet: Table S1
	Table S1. Frequency of the breathing cessation events.
		Global
		n=116
		median [p25;p75]
	Obstructive apnea index
	Total sleep time	5.00 [0.86;14.1]
	NREM sleep	3.81 [0.73;14.4]
	REM sleep	2.07 [0.00;15.2]
	Central apnea index
	Total sleep time	0.22 [0.00;1.33]
	NREM sleep	0.21 [0.00;1.42]
	REM sleep	0.00 [0.00;0.00]
	Mixed apnea index
	Total sleep time	0.00 [0.00;0.79]
	NREM sleep	0.00 [0.00;0.83]
	REM sleep	0.00 [0.00;0.00]
	Hypopnea index
	Total sleep time	14.7 [8.32;25.8]
	NREM sleep	13.9 [8.04;27.2]
	REM sleep	12.5 [0.25;23.8]
	Frequency of the breathing cessation events that compose the AHI considering the total sleep time and in each sleep stage. AHI, apnea-hypopnea index; p, percentile.
