# Supplementary material for: Breathing cessation events that compose the apnea–hypopnea index are distinctively associated with the adverse outcomes in Alzheimer’s disease
Source: Alzheimers Res Ther. 2023 Jul 14;15:123. doi: 10.1186/s13195-023-01266-x (PMC10347810; doi:10.1186/s13195-023-01266-x)
Supplement: Supplementary file 2 — Additional file 2: Table S2. Sleep structure according to the breathing cessation events in each sleep stage. [file 13195_2023_1266_MOESM2_ESM.xlsx]

## Sheet: Table S2
	Table S2. Sleep structure according to the breathing cessation events in each sleep stage.
		N1				N2				SWS				REM sleep				Arousals
		Effect size (95% CI)		p-value		Effect size (95% CI)		p-value		Effect size (95% CI)		p-value		Effect size (95% CI)		p-value		Effect size (95% CI)		p-value
	Obstructive apnea index
	NREM sleep	0.321	(0.15 to 0.492)	< 0.001		0.091	(-0.099 to 0.281)	0.349		-0.231	(-0.409 to -0.053)	0.013		-0.039	(-0.233 to 0.155)	0.693		0.801	(0.672 to 0.93)	< 0.001
	REM sleep	0.092	(-0.088 to 0.272)	0.32		0.146	(-0.04 to 0.332)	0.128		-0.107	(-0.289 to 0.075)	0.252		-0.066	(-0.258 to 0.126)	0.504		0.312	(0.128 to 0.496)	0.001
	Central apnea index
	NREM sleep	0.269	(0.098 to 0.44)	0.003		-0.16	(-0.346 to 0.026)	0.095		-0.076	(-0.256 to 0.104)	0.413		-0.006	(-0.198 to 0.186)	0.952		0.162	(-0.024 to 0.348)	0.092
	REM sleep	-0.054	(-0.23 to 0.122)	0.549		0.142	(-0.038 to 0.322)	0.125		0.073	(-0.103 to 0.249)	0.421		0.077	(-0.109 to 0.263)	0.422		-0.088	(-0.276 to 0.1)	0.364
	Mixed apnea index
	NREM sleep	0.18	(0.006 to 0.354)	0.046		0.144	(-0.042 to 0.33)	0.13		-0.042	(-0.222 to 0.138)	0.649		0.109	(-0.081 to 0.299)	0.26		0.427	(0.256 to 0.598)	< 0.001
	REM sleep	0.045	(-0.133 to 0.223)	0.621		0.098	(-0.086 to 0.282)	0.3		-0.012	(-0.192 to 0.168)	0.897		0.087	(-0.103 to 0.277)	0.369		0.203	(0.017 to 0.389)	0.036
	Hypopnea index
	NREM sleep	0.019	(-0.159 to 0.197)	0.833		0.147	(-0.037 to 0.331)	0.122		-0.12	(-0.3 to 0.06)	0.195		-0.104	(-0.294 to 0.086)	0.287		0.549	(0.39 to 0.708)	< 0.001
	REM sleep	-0.066	(-0.248 to 0.116)	0.483		-0.093	(-0.281 to 0.095)	0.333		-0.047	(-0.231 to 0.137)	0.619		0.069	(-0.125 to 0.263)	0.485		0.08	(-0.118 to 0.278)	0.431
	Linear regression models adjusted by age, sex, and BMI representing the sleep structure according to the breathing cessation events that compose the AHI. AHI, apnea-hypopnea index; BMI, body mass index; CI, confidence interval; SWS, slow-wave sleep.
